# Supplementary material for: Therapeutic efficacy of matrix metalloproteinase-12 suppression on neurological recovery after ischemic stroke: Optimal treatment timing and duration
Source: PubMed Central journal article supplement (PMC9577328; doi:10.3389/fnins.2022.1012812), 2022-10-04
Supplement: Data_Sheet_1.pdf [file Data_Sheet_1.pdf]

## Supplementary Material

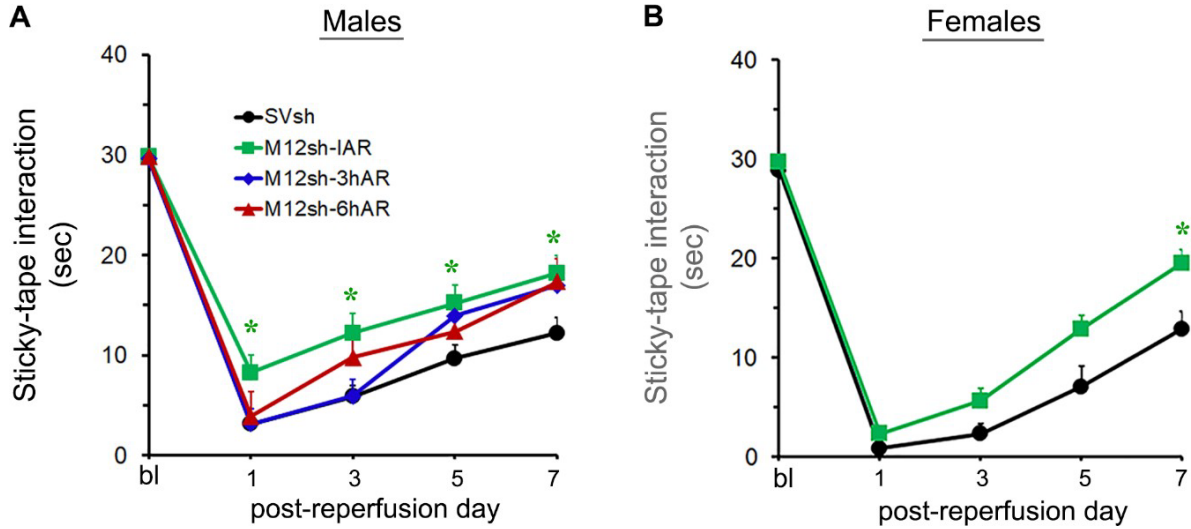

**Supplementary Fig. 1.** The effects of a single M12sh treatment given on different times after reperfusion on the sticky tape interaction time in male (**A**) and female (**B**) rats during the seven-day period after reperfusion. Following 2-h focal cerebral ischemia, male and female rats were subjected to treatments with either SVsh (immediately after reperfusion) or M12sh (immediately, 3-h or 6-h after reperfusion) and the sticky-tape interaction time of the left (contralateral) forelimb of the rats were evaluated at baseline (bl) and at regular intervals (days 1, 3, 5, and 7).  $n = 28$  males and 11 females (SVsh group), 27 males and 20 females (M12sh-IAR group), 11 males (M12sh-3hAR group), and 12 males (M12sh-6hAR group). Statistical analysis: Two-way repeated-measures ANOVA followed by Dunnett's/Sidak's multiple comparisons test.  $*p < 0.05$  vs. SVsh (respective post-reperfusion day).

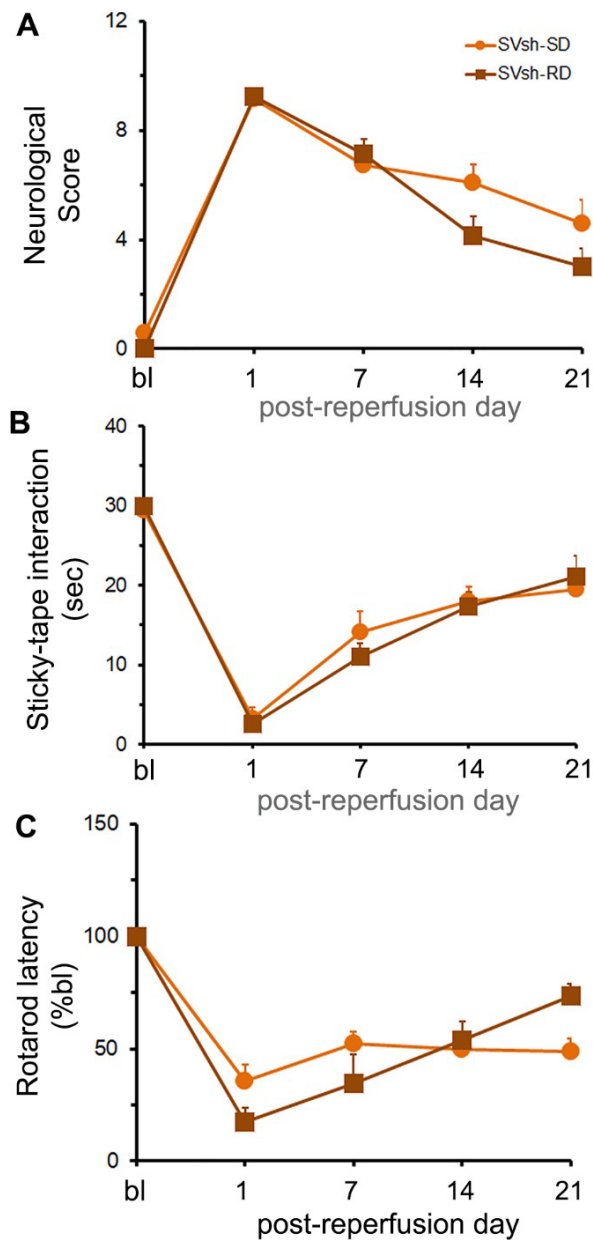

**Supplementary Fig. 2.** Effect of single and repeated dose SVsh treatments on post-stroke neurological/functional recovery in male rats. Following 2-h focal cerebral ischemia, male rats subjected to treatments with either single dose (SD) SVsh (immediately after reperfusion) or repeated dose (RD) SVsh (immediately after reperfusion and on days 7 and 14) were evaluated in different tests at baseline (bl) and at regular intervals (days 1, 7, 14, and 21). Post-ischemic neurological scores were determined by mNSS assessment (A), somatosensory function by the modified adhesive removal (B) test, and motor function by the accelerating Rotarod performance (C) test.  $n = 8-12$  (SVsh-SD group) and 8 (SVsh-RD group). Statistical analysis: Two-way repeated-measures ANOVA followed by Sidak's multiple comparisons test. There were no statistically significant effects of the treatment.

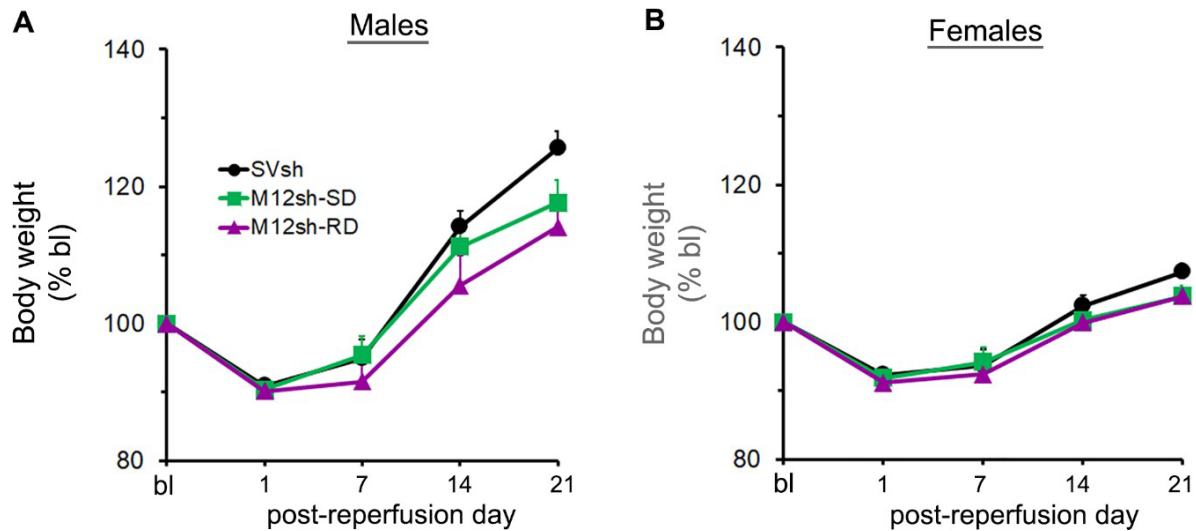

**Supplementary Fig. 3.** The effects of single and repeated dose M12sh treatments on post-ischemic body weight changes during the 21-day period after reperfusion. The line graphs show the changes in body weight of male (A) and female (B) rats subjected to 2-hour focal cerebral ischemia and treated with either single dose (SD) SVsh/M12sh (immediately after reperfusion) or repeated dose (RD) M12sh (immediately after reperfusion and on days 7 and 14) at baseline (bl) and at regular intervals (days 1, 7, 14, and 21).  $n = 12$  males and 12 females (SVsh and M12sh-SD groups) and 10 males and 10 females (M12sh-RD group). Statistical analysis: Two-way repeated-measures ANOVA followed by Tukey's multiple comparisons test. There were no statistically significant effects of the treatments on body weight.

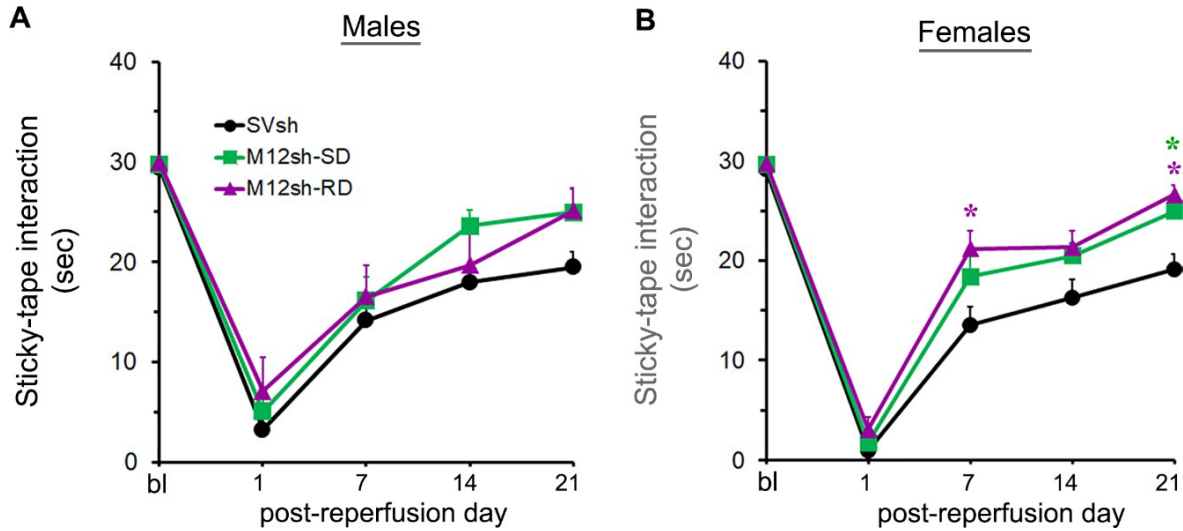

**Supplementary Fig. 4.** The effects of single and repeated dose M12sh treatment on the sticky tape interaction time in male and female rats. Following 2-h focal cerebral ischemia, male (**A**) and female (**B**) rats were subjected to treatments with either single dose (SD) SVsh/M12sh (immediately after reperfusion) or repeated dose (RD) M12sh (immediately after reperfusion and on days 7 and 14) the sticky tape interaction time of the left (contralateral) forelimb was evaluated at baseline (bl) and at regular intervals (days 1, 7, 14, and 21).  $n = 12$  males and 11 females (SVsh group), 11 males and 9 females (M12sh-SD group), and 9 males and 10 females (M12sh-RD group). Statistical analysis: Two-way repeated-measures ANOVA followed by Tukey's multiple comparisons test. \* $p < 0.05$  vs SVsh (respective post-reperfusion day).

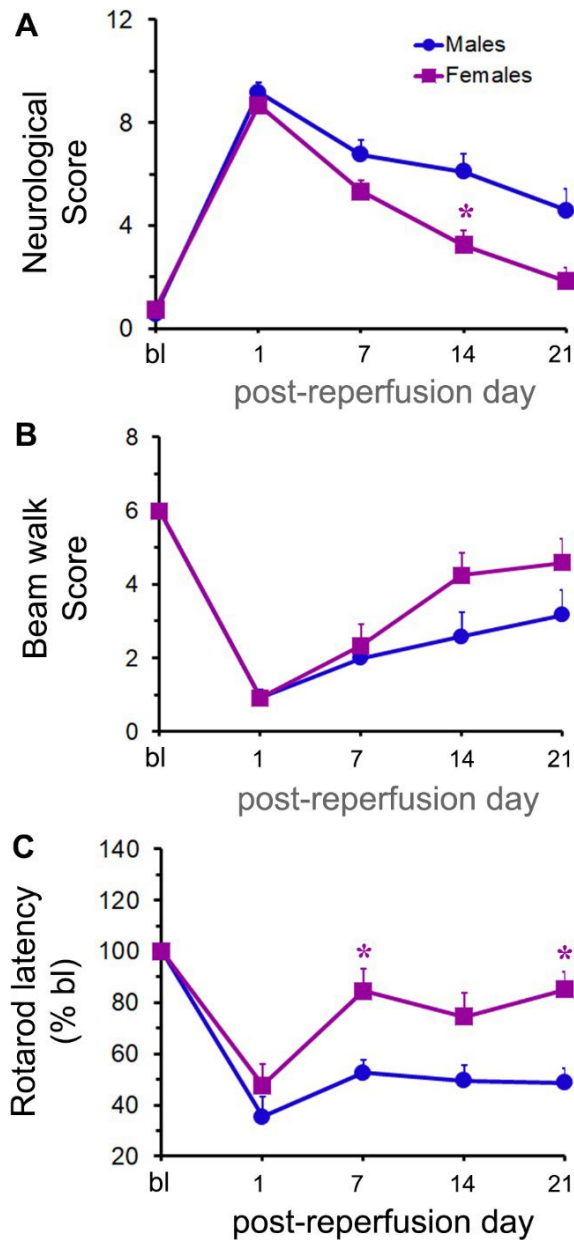

**Supplementary Fig. 5.** Sex differences in post-stroke neurological outcome. Following 2-h focal cerebral ischemia, male and female rats treated immediately after reperfusion with a single dose control shRNA (SVsh) were evaluated for assessment of neurological and functional tests at baseline (bl) and at regular intervals (days 1, 7, 14, and 21). Post-ischemic neurological and functional deficits were assessed by the mNSS assessment (A), the beam walk (B), and the accelerating Rotarod performance (C) tests.  $n = 8-12$  males and  $10-12$  females for the different tests. Statistical analysis: Two-way repeated-measures ANOVA followed by Sidak's multiple comparisons test.  $*p < 0.05$  vs males (respective post-reperfusion day).
